# Supplementary material for: Factors Associated With Potentially Missed Diagnosis of Appendicitis in the Emergency Department
Source: PubMed Central journal article supplement (PMC7063499; doi:10.1001/jamanetworkopen.2020.0612), 2020-03-09
Supplement: jamanetwopen-3-e200612-s001.pdf [file jamanetwopen-3-e200612-s001.pdf]

## Supplementary Online Content

Mahajan P, Basu T, Pai C-W, et al. Factors associated with potentially missed diagnosis of appendicitis in the emergency department. *JAMA Netw Open*. 2020;3(3):e200612. doi:10.1001/jamanetworkopen.2020.0612

**eMethods.** SAS Codes

**eFigure.** Kaplan-Meier Curves for Days From Index Emergency Department Visit to Appendicitis Diagnosis Stratified by Adults and Children With 95% Hall-Wellner Bands

**eTable 1.** Diagnosis and Procedure Codes

**eTable 2.** Percent of Potentially Missed Appendicitis for Demographic and Visit Characteristics

**eTable 3.** Frequency of Clinical Symptoms and Combinations of Symptoms in Patients With Same Day Diagnosis Compared With Those with Potentially Missed Appendicitis

**eTable 4.** Adults—Multivariable Modeling of Potentially Missed Appendicitis With Abdominal Pain and Its Combination With Other Symptom(s) Included Along with Other Covariates (N = 100 833)

**eTable 5.** Children—Multivariable Modeling of Potentially Missed Appendicitis With Abdominal Pain and Its Combination with Other Symptom(s) Included Along With Other Covariates (N = 22 250)

**eTable 6.** Potentially Missed Appendicitis Cases That Had Imaging at Index Emergency Department Visit Compared With Those That Had Imaging on Return Visit

This supplementary material has been provided by the authors to give readers additional information about their work.

## eMethods. SAS Codes

### Demographics

```
%Include 'H:\optum\Table\Table.sas';
%Table(dsn=dat.adult_apr,
var =age bus Gdr_Cd RACE_n region comorbidity CT US XRAY cbc_test urine_test,
type=c d d d d d d d d,
labelwrap=y,
by=sdd,
outdoc=H:\ED-Prasant\April_2019\Demo_Adult_2019.rtf,
meandec=1,
title1=Demographical Characteristics);
```

### Crude odds ratios per symptom

```
%macro od(sym=);
ods pdf body="H:\ED-Prasant\April_2019\Adult\logistic_&sym..pdf";
proc logistic data=dat.adult_apr ;
class &sym(ref="No") /param=ref;
model sdd(event="0")= &sym ;

LABEL NO_ABD="NO ABD";
LABEL S1_ONLY="ABDOMINAL PAIN ONLY";
LABEL ABD_CONS="ABD & CONSTIPATION";
LABEL ABD_VOM="ABD & VOMITING";
LABEL ABD_VOM_FEV="ABD & VOMITING & FEVER";
LABEL ABD_VOM_FEV_CONS="ABD & CONSTIPATION & FEVER & VOMITING";
run;
ods pdf close;
%mend od;

%od(sym=s1_only);
%od(sym=ABD_cons);
%od(sym=ABD_VOM);
%od(sym=ABD_VOM_FEV);
%od(sym=ABD_VOM_FEV_CONS);
%od(sym=NO_abd);
```

### Adjusted odds ratios per symptom (along with other covariates)

```
%macro od(sym=);
ods pdf body="H:\ED-Prasant\April_2019\adult\nAdjORs_&sym..pdf";

proc logistic data=dat.adult_apr ;
where GDR_CD ne "U" & region ne "U" ;
class bus region (ref="West") race_n(ref="W") GDR_CD(ref="M") comorbidity(ref="None")
AGE_f(ref="18 to 25 years") urine_test(ref="No") cbc_test(ref="No") ct(ref="No") us(ref="No") xray(ref="No")
/param=ref;
model sdd(event="0")= &sym AGE_f GDR_CD race_n region comorbidity bus urine_test cbc_test ct us xray
ct*us ct*xray us*xray;
run;
%mend od;
```

```
%od(sym=S1_ONLY);
%od(sym=ABD_CONS);
%od(sym=ABD_VOM);
%od(sym=ABD_VOM_FEV);
%od(sym=ABD_VOM_FEV_CONS);
%od(sym=NO_ABD);
```

### **Adjusted odds ratios stratified by symptom**

```
%macro od(sym=);
ods pdf body="H:\ED-Prasant\April_2019\adult\Stratified_&sym..pdf";
proc logistic data=dat.adult_apr ;
where GDR_CD ne "U" & region ne "U" & &sym=1;
class bus region (ref="West") race_n(ref="W") GDR_CD(ref="M") comorbidity(ref="None")
AGE_f(ref="18 to 25 years") ct(ref="No") us(ref="No") xray(ref="No") urine_test(ref="No")
cbc_test(ref="No")/param=ref;
model sdd(event="0") = AGE_f GDR_CD race_n region comorbidity bus urine_test cbc_test ct*us
ct*xray us*xray;
run;
ods pdf close;
%mend od;
```

```
%od(sym=ABD);
%od(sym=VOMITTING);
%od(sym=FEVER);
%od(sym=DIARRHEA);
%od(sym=CONSTIPATION);
```

### **Survival curves**

```
ods pdf file="H:\ED-Prasant\April_2019\Figure2.pdf";
proc lifetest data=dat.data1 atrisk plots=survival(atrisk cb) timelist=0 to 30 by 2;
strata age_cat;
time day*sdd(1);
label day="Days Since Index ED Visit";
label age_cat="Study population";
format age_cat adult. ;
run;
ods pdf close;
```

**eFigure.** Kaplan-Meier Curves for Days From Index Emergency Department Visit to Appendicitis Diagnosis Stratified by Adults and Children With 95% Hall-Wellner Bands

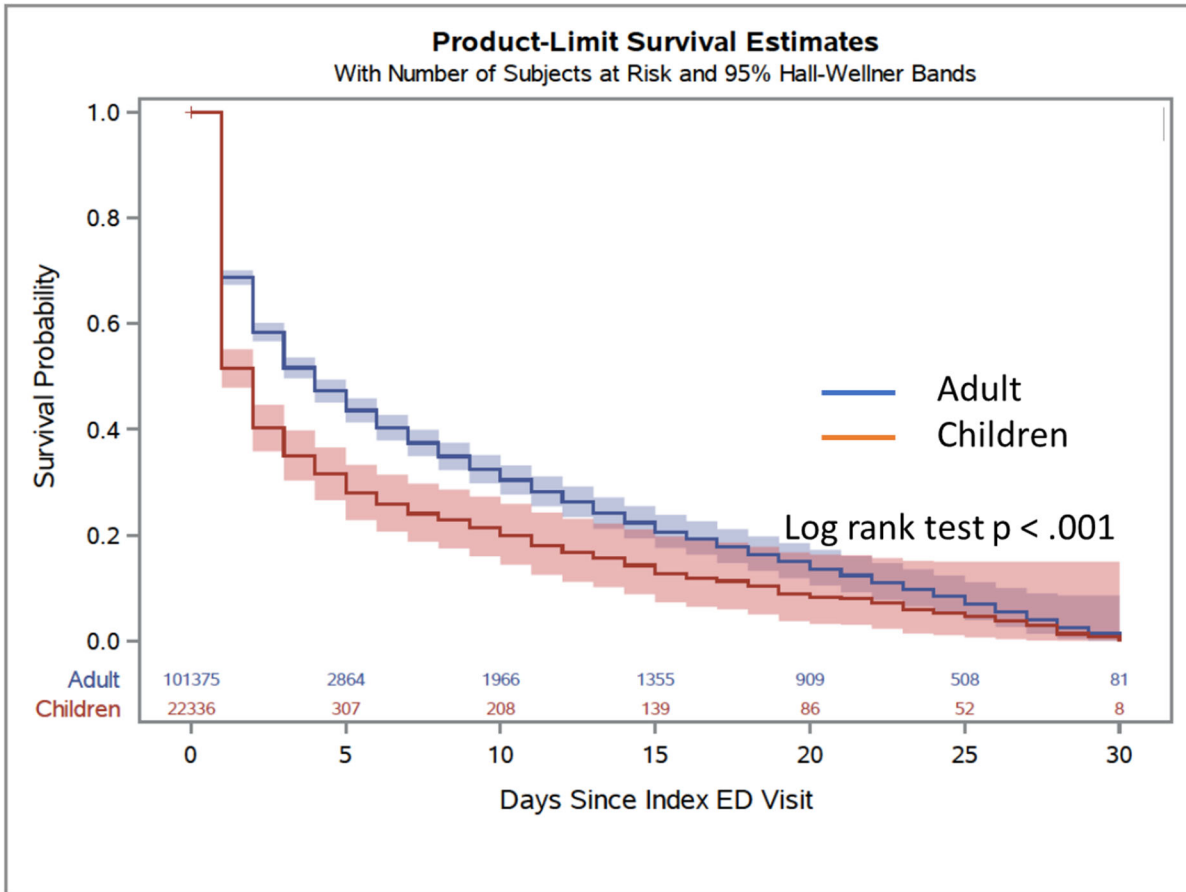

ED indicates emergency department.

The y-axis represents the appendicitis-free survival probability in potentially missed appendicitis cohort stratified by children and adults, while the x-axis represents the number of days following the index ED visit. The log rank test is used as a basis to determine if the survival curves are different (by the strata).

**eTable 1.** Diagnosis and Procedure Codes

| <b>Diagnostic Code</b> | <b>ICD-9-CM</b>                      | <b>ICD-10-CM</b>                                                                                                                                                                                                                                                                                                                                                                                                               | <b>CPT-4</b>                                                | <b>DRG</b>                             |
|------------------------|--------------------------------------|--------------------------------------------------------------------------------------------------------------------------------------------------------------------------------------------------------------------------------------------------------------------------------------------------------------------------------------------------------------------------------------------------------------------------------|-------------------------------------------------------------|----------------------------------------|
| Appendicitis           | 540<br>541<br>542<br>543             | K35<br>K36<br>K37<br>K38                                                                                                                                                                                                                                                                                                                                                                                                       |                                                             |                                        |
| Abdominal pain         | 789.0                                | R10                                                                                                                                                                                                                                                                                                                                                                                                                            |                                                             |                                        |
| Vomiting/nausea        | 787.0                                | R11                                                                                                                                                                                                                                                                                                                                                                                                                            |                                                             |                                        |
| Diarrhea               | 787.91                               | R19.7                                                                                                                                                                                                                                                                                                                                                                                                                          |                                                             |                                        |
| Constipation           | 564.0                                | K59.0                                                                                                                                                                                                                                                                                                                                                                                                                          |                                                             |                                        |
| Fever                  | 780.60                               | R50.9                                                                                                                                                                                                                                                                                                                                                                                                                          |                                                             |                                        |
| <b>Procedure Code</b>  |                                      |                                                                                                                                                                                                                                                                                                                                                                                                                                |                                                             |                                        |
| Appendectomy           | 47.0<br>47.1<br>47.2<br>47.9<br>54.1 | 0D5J0ZZ<br>0D5J3ZZ<br>0D5J4ZZ<br>0D5J7ZZ<br>0D5J8ZZ<br>0D9J00Z<br>0D9J0ZX<br>0D9J0ZZ<br>0D9J30Z<br>0D9J3ZX<br>0D9J3ZZ<br>0D9J40Z<br>0D9J4ZX<br>0D9J4ZZ<br>0D9J70Z<br>0D9J7ZX<br>0D9J7ZZ<br>0D9J80Z<br>0D9J8ZX<br>0D9J8ZZ<br>0DBJ0ZX<br>0DBJ0ZZ<br>0DBJ3ZX<br>0DBJ3ZZ<br>0DBJ4ZX<br>0DBJ4ZZ<br>0DBJ7ZX<br>0DBJ7ZZ<br>0DBJ8ZX<br>0DBJ8ZZ<br>0DCJ0ZZ<br>0DCJ3ZZ<br>0DCJ4ZZ<br>0DCJ7ZZ<br>0DCJ8ZZ<br>0DFJ0ZZ<br>0DFJ3ZZ<br>0DFJ4ZZ | 44900<br>44901<br>44950<br>44955<br>44960<br>44970<br>44979 | 338<br>339<br>340<br>341<br>342<br>343 |

|                 |  |                                                                                                 |                                                                      |  |
|-----------------|--|-------------------------------------------------------------------------------------------------|----------------------------------------------------------------------|--|
|                 |  | 0DFJ7ZZ<br>0DFJ8ZZ<br>0DNJ7ZZ<br>0DNJ8ZZ                                                        |                                                                      |  |
|                 |  | 0DQJ0ZZ<br>0DQJ3ZZ<br>0DQJ4ZZ<br>0DQJ7ZZ<br>0DQJ8ZZ<br>0DTJ0ZZ<br>0DTJ4ZZ<br>0DTJ7ZZ<br>0DTJ8ZZ |                                                                      |  |
| Urinalysis      |  |                                                                                                 | 81001<br>81002<br>81003<br>81005                                     |  |
| CBC             |  |                                                                                                 | 85025<br>85027                                                       |  |
| Abdominal CT    |  |                                                                                                 | 74150<br>74160<br>74170<br>74174<br>74175<br>74176<br>74177<br>74178 |  |
| Abdominal US    |  |                                                                                                 | 76700<br>76705                                                       |  |
| Abdominal x-ray |  |                                                                                                 | 74000<br>74010<br>74020<br>74022                                     |  |

Abbreviations: CBC, complete blood count; CPT-4, Current Procedural Terminology, 4<sup>th</sup> Edition; CT, computed tomography; DRG, Diagnosis-Related Group; ICD-9-CM, International Classification of Diseases, 9<sup>th</sup> Revision, Clinical Modification; ICD-10-CM, International Statistical Classification of Diseases and Related Health Problems, 10<sup>th</sup> Revision; US, Ultrasonography.

**eTable 2.** Percent of Potentially Missed Appendicitis for Demographic and Visit Characteristics

|                   | Adult |                                     |                                   |         | Children |                                     |                                   |         |
|-------------------|-------|-------------------------------------|-----------------------------------|---------|----------|-------------------------------------|-----------------------------------|---------|
|                   | All   | Potentially Missed Appendicitis No. | Potentially Missed Appendicitis % | P Value | All      | Potentially Missed Appendicitis No. | Potentially Missed Appendicitis % | P Value |
| Sex               |       |                                     |                                   |         |          |                                     |                                   |         |
| Female            | 51923 | 3884                                | 7.5%                              | <.001   | 9631     | 533                                 | 5.5%                              | <.001   |
| Male              | 49452 | 2176                                | 4.4%                              |         | 12705    | 440                                 | 3.5%                              |         |
| Race              |       |                                     |                                   |         | 0        |                                     |                                   |         |
| White             | 56672 | 3473                                | 6.1%                              | <.001   | 12875    | 594                                 | 4.6%                              | .05     |
| Asian             | 3206  | 135                                 | 4.2%                              |         | 713      | 29                                  | 4.1%                              |         |
| Black             | 6435  | 506                                 | 7.9%                              |         | 1044     | 53                                  | 5.1%                              |         |
| Hispanic          | 11400 | 643                                 | 5.6%                              |         | 3331     | 118                                 | 3.5%                              |         |
| Unknown           | 23652 | 1303                                | 5.5%                              |         | 4373     | 179                                 | 4.1%                              |         |
| Comorbidity index |       |                                     |                                   |         |          |                                     |                                   |         |
| 0                 | 48282 | 1468                                | 3.0%                              | <.001   | 17108    | 598                                 | 3.5%                              | <.001   |
| 1                 | 20529 | 1078                                | 5.3%                              |         | 4029     | 254                                 | 6.3%                              |         |
| 2 or higher       | 32564 | 3514                                | 10.8%                             |         | 1199     | 121                                 | 10.1%                             |         |
| Imaging study     |       |                                     |                                   |         |          |                                     |                                   |         |
| CT                | 93424 | 5183                                | 5.5%                              | <.001   | 13399    | 630                                 | 4.7%                              | .002    |
| US                | 10032 | 1354                                | 13.5%                             | <.001   | 9764     | 468                                 | 4.8%                              | .005    |
| X-ray             | 11880 | 1693                                | 14.3%                             | <.001   | 4384     | 367                                 | 8.4%                              | <.001   |
| Lab test          |       |                                     |                                   |         |          |                                     |                                   |         |
| Urinalysis        | 21396 | 1592                                | 7.4%                              | <.001   | 3716     | 217                                 | 5.8%                              | <.001   |
| CBC               | 22856 | 2032                                | 8.9%                              | <.001   | 3281     | 222                                 | 6.8%                              | <.001   |
| Census region     |       |                                     |                                   |         |          |                                     |                                   |         |
| Midwest           | 24804 | 1521                                | 6.1%                              | .06     | 5384     | 269                                 | 5.0%                              | .026    |
| Northeast         | 9292  | 582                                 | 6.3%                              |         | 1976     | 70                                  | 3.5%                              |         |
| South             | 44876 | 2583                                | 5.8%                              |         | 9887     | 435                                 | 4.4%                              |         |
| West              | 21878 | 1335                                | 6.1%                              |         | 5004     | 195                                 | 3.9%                              |         |
| Unknown           | 525   | 39                                  | 7.4%                              |         | 85       | 4                                   | 4.7%                              |         |
| Insurance         |       |                                     |                                   |         |          |                                     |                                   |         |
| Commercial        | 82552 | 4066                                | 4.9%                              | <.001   | 22336    | 973                                 | 4.4%                              | --      |
| Medicare          | 18823 | 1994                                | 10.6%                             |         | --       | --                                  | --                                | --      |

Abbreviations: CBC, complete blood count ; CT, computed tomography; US, ultrasonography.

For race and ethnicity, we used the definitions from the Clinformatics DataMart, where there is only one race category and each appear mutually exclusive. They use a proprietary algorithm representing a compilation of fields including known race or proprietary ethnic code tables. This is a combination of information sources including public records, self-reported surveys, and a proprietary ethnic code table.

**eTable 3.** Frequency of Clinical Symptoms and Combinations of Symptoms in Patients With Same Day Diagnosis Compared With Those with Potentially Missed Appendicitis

|                                          | Adult, No. (%)                   |                                              |         | Children, No. (%)                |                                            |         |
|------------------------------------------|----------------------------------|----------------------------------------------|---------|----------------------------------|--------------------------------------------|---------|
|                                          | Same Day Diagnosis<br>(N=95,315) | Potentially Missed Appendicitis<br>(N=6,060) | P Value | Same Day Diagnosis<br>(N=21,363) | Potentially Missed Appendicitis<br>(N=973) | P Value |
| Any individual symptom                   |                                  |                                              |         |                                  |                                            |         |
| Abdominal pain                           | 93,285 (97.9)                    | 5487 (90.5)                                  | <.001   | 20,948 (98.1)                    | 906 (93.1)                                 | <.001   |
| Vomiting/nausea                          | 29,768 (31.2)                    | 2126 (35.1)                                  | <.001   | 8,598 (40.2)                     | 420 (43.2)                                 | .07     |
| Fever                                    | 6,272 (6.6)                      | 552 (9.1)                                    | <.001   | 3,619 (16.9)                     | 182 (18.7)                                 | .15     |
| Diarrhea                                 | 6,292 (6.6)                      | 740 (12.2)                                   | <.001   | 1,597 (7.5)                      | 103 (10.6)                                 | <.001   |
| Constipation                             | 4,014 (4.2)                      | 548 (9.0)                                    | <.001   | 1,541 (7.2)                      | 140 (14.4)                                 | <.001   |
| Abdominal pain only                      | 56,644 (59.4)                    | 2,811 (46.4)                                 | <.001   | 10,003 (46.8)                    | 374 (38.4)                                 | <.001   |
| No abdominal pain at all                 | 2,030 (2.1)                      | 573 (9.5)                                    | <.001   | 415 (1.9)                        | 67 (6.9)                                   | <.001   |
| Combination of symptoms                  |                                  |                                              |         |                                  |                                            |         |
| Abdominal pain + vomiting/nausea         | 21,154 (22.2)                    | 1,195 (19.7)                                 | <.001   | 5,140 (24.1)                     | 199 (20.5)                                 | .01     |
| Abdominal pain + fever                   | 2,748 (2.9)                      | 177 (2.9)                                    | .86     | 1,268 (5.9)                      | 51 (5.2)                                   | .37     |
| Abdominal pain + diarrhea                | 1,715 (1.8)                      | 184 (3.0)                                    | <.001   | 264 (1.2)                        | 15 (1.5)                                   | .40     |
| Abdominal pain + constipation            | 1,953 (2.0)                      | 228 (3.8)                                    | <.001   | 636 (3.0)                        | 67 (6.9)                                   | <.001   |
| Abdominal pain + vomiting/nausea + fever | 2,103 (2.2)                      | 103 (1.7)                                    | .009    | 1,434 (6.7)                      | 55 (5.7)                                   | .19     |



**eTable 4.** Adults—Multivariable Modeling of Potentially Missed Appendicitis With Abdominal Pain and Its Combination With Other Symptom(s) Included Along with Other Covariates (N = 100 833)

|                                                   | Adjusted Odds Ratio (95% CI) |                         |                            |
|---------------------------------------------------|------------------------------|-------------------------|----------------------------|
|                                                   | Abd Pain Only                | Abd Pain + Constipation | Abd Pain + Nausea/Vomiting |
| Symptom                                           | 0.65 (0.62-0.69)             | 1.51 (1.31-1.75)        | 0.90 (0.84-0.97)           |
| Age group (reference=18-25)                       |                              |                         |                            |
| 26 - 40                                           | 1.01 (0.92-1.11)             | 1.00 (0.91-1.09)        | 0.99 (0.91-1.09)           |
| 41 - 64                                           | 0.86 (0.79-0.95)             | 0.84 (0.77-0.92)        | 0.83 (0.76-0.92)           |
| 65 or older                                       | 0.91 (0.80-1.04)             | 0.88 (0.77-1.00)        | 0.87 (0.76-0.99)           |
| Sex (reference=male)                              |                              |                         |                            |
| Female                                            | 1.56 (1.47-1.64)             | 1.59 (1.51-1.68)        | 1.60 (1.51-1.69)           |
| Race (reference=white)                            |                              |                         |                            |
| Asian                                             | 0.75 (0.62-0.89)             | 0.74 (0.62-0.88)        | 0.74 (0.62-0.89)           |
| Black                                             | 1.15 (1.04-1.27)             | 1.15 (1.04-1.28)        | 1.16 (1.05-1.28)           |
| Hispanic                                          | 0.96 (0.88-1.06)             | 0.96 (0.87-1.05)        | 0.96 (0.87-1.05)           |
| Unknown/missing                                   | 0.93 (0.87-1.00)             | 0.93 (0.87-1.00)        | 0.93 (0.87-1.00)           |
| Comorbidity Index (reference=0)                   |                              |                         |                            |
| 1                                                 | 1.72 (1.58-1.86)             | 1.73 (1.59-1.88)        | 1.73 (1.60-1.88)           |
| 2 or higher                                       | 3.43 (3.18-3.69)             | 3.53 (3.28-3.80)        | 3.54 (3.29-3.81)           |
| Imaging study (reference=no imaging study)        |                              |                         |                            |
| Any CT                                            | 0.51 (0.46-0.57)             | 0.51 (0.46-0.56)        | 0.51 (0.46-0.57)           |
| Any US, no CT                                     | 1.94 (1.65-2.29)             | 1.92 (1.63-2.26)        | 1.92 (1.63-2.26)           |
| X-ray only                                        | 2.52 (1.99-3.18)             | 2.60 (2.06-3.28)        | 2.66 (2.11-3.35)           |
| Insurance (reference=Medicare)                    |                              |                         |                            |
| Commercial                                        | 0.79 (0.72-0.88)             | 0.78 (0.71-0.87)        | 0.78 (0.70-0.86)           |
| Census region (reference=West)                    |                              |                         |                            |
| Midwest                                           | 1.10 (1.02-1.19)             | 1.10 (1.02-1.19)        | 1.10 (1.02-1.19)           |
| Northeast                                         | 0.99 (0.90-1.10)             | 1.01 (0.91-1.12)        | 1.01 (0.91-1.12)           |
| South                                             | 0.94 (0.88-1.01)             | 0.96 (0.90-1.03)        | 0.96 (0.90-1.03)           |
| Lab test (reference=respective lab not performed) |                              |                         |                            |
| Urinalysis                                        | 0.93 (0.87-1.00)             | 0.92 (0.86-0.99)        | 0.92 (0.86-0.99)           |
| CBC                                               | 1.37 (1.28-1.47)             | 1.39 (1.29-1.49)        | 1.39 (1.29-1.49)           |
| C-statistic                                       | 0.710                        | 0.704                   | 0.703                      |
| Symptom                                           | 0.78 (0.64-0.95)             | 0.94 (0.47-1.87)        | 3.57 (3.22-3.95)           |
| Age group (reference=18-25)                       |                              |                         |                            |
| 26 - 40                                           | 0.99 (0.91-1.09)             | 0.99 (0.91-1.09)        | 0.99 (0.90-1.09)           |
| 41 - 64                                           | 0.84 (0.77-0.92)             | 0.84 (0.77-0.92)        | 0.83 (0.76-0.91)           |
| 65 or older                                       | 0.88 (0.77-1.00)             | 0.88 (0.77-1.00)        | 0.84 (0.74-0.96)           |
| Sex (reference=male)                              |                              |                         |                            |

|                                                   |                  |                  |                  |
|---------------------------------------------------|------------------|------------------|------------------|
| Female                                            | 1.59 (1.51-1.68) | 1.59 (1.51-1.68) | 1.62 (1.53-1.71) |
| Race (reference=white)                            |                  |                  |                  |
| Asian                                             | 0.74 (0.62-0.89) | 0.74 (0.62-0.89) | 0.74 (0.62-0.89) |
| Black                                             | 1.16 (1.05-1.28) | 1.16 (1.05-1.28) | 1.14 (1.03-1.26) |
| Hispanic                                          | 0.96 (0.87-1.05) | 0.96 (0.87-1.05) | 0.95 (0.87-1.04) |
| Unknown/missing                                   | 0.94 (0.87-1.00) | 0.94 (0.87-1.00) | 0.93 (0.87-1.00) |
| Comorbidity Index (reference=0)                   |                  |                  |                  |
| 1                                                 | 1.73 (1.60-1.88) | 1.73 (1.60-1.88) | 1.73 (1.59-1.88) |
| 2 or higher                                       | 3.54 (3.29-3.81) | 3.54 (3.29-3.81) | 3.44 (3.19-3.70) |
| Imaging study (reference=no any imaging study)    |                  |                  |                  |
| Any CT                                            | 0.51 (0.46-0.57) | 0.51 (0.46-0.57) | 0.56 (0.50-0.62) |
| Any US, no CT                                     | 1.92 (1.63-2.26) | 1.92 (1.63-2.26) | 2.08 (1.77-2.46) |
| X-ray only                                        | 2.64 (2.10-3.33) | 2.65 (2.10-3.34) | 2.69 (2.13-3.41) |
| Insurance (reference=Medicare)                    |                  |                  |                  |
| Commercial                                        | 0.78 (0.70-0.86) | 0.78 (0.70-0.86) | 0.80 (0.73-0.89) |
| Census region (reference=West)                    |                  |                  |                  |
| Midwest                                           | 1.10 (1.02-1.19) | 1.10 (1.02-1.19) | 1.09 (1.00-1.18) |
| Northeast                                         | 1.01 (0.91-1.12) | 1.01 (0.91-1.12) | 1.00 (0.90-1.11) |
| South                                             | 0.96 (0.90-1.03) | 0.96 (0.90-1.03) | 0.96 (0.89-1.03) |
| Lab test (reference=respective lab not performed) |                  |                  |                  |
| Urinalysis                                        | 0.92 (0.86-0.99) | 0.92 (0.86-0.99) | 0.95 (0.88-1.02) |
| CBC                                               | 1.39 (1.30-1.49) | 1.39 (1.29-1.49) | 1.37 (1.28-1.47) |
| C-statistic                                       | 0.703            | 0.703            | 0.711            |

Abbreviations: Abd, abdominal; CBC, complete blood count; CT, computed tomography; US, ultrasonography.

For adjusted odds ratios with presence of symptom, referent groups include all others that were not in this undifferentiated symptom category. For example, patient episodes that presented with “abdominal pain only” would have a referent group of all others that were not “abdominal pain only”.

For race and ethnicity, we used the definitions from the Clinformatics DataMart, where there is only one race category and each appear mutually exclusive. They use a proprietary algorithm representing a compilation of fields including known race or proprietary ethnic code tables. This is a combination of information sources including public records, self-reported surveys, and a proprietary ethnic code table.

**eTable 5.** Children—Multivariable Modeling of Potentially Missed Appendicitis With Abdominal Pain and Its Combination with Other Symptom(s) Included Along With Other Covariates (N = 22 250)

|                                                   | Adjusted Odds Ratio (95% CI) |                         |                            |
|---------------------------------------------------|------------------------------|-------------------------|----------------------------|
|                                                   | Abd Pain Only                | Abd Pain + Constipation | Abd Pain + Nausea/Vomiting |
| Symptom                                           | 0.79 (0.69-0.90)             | 2.43 (1.86-3.17)        | 0.84 (0.71-0.98)           |
| Age group (reference=0-5)                         |                              |                         |                            |
| 6 – 10                                            | 0.50 (0.39-0.63)             | 0.53 (0.41-0.68)        | 0.49 (0.38-0.62)           |
| 11 - 15                                           | 0.52 (0.41-0.65)             | 0.47 (0.37-0.60)        | 0.50 (0.40-0.63)           |
| 16 - 17                                           | 0.56 (0.44-0.72)             | 0.49 (0.39-0.61)        | 0.54 (0.42-0.69)           |
| Sex (reference=male)                              |                              |                         |                            |
| Female                                            | 1.60 (1.41-1.83)             | 1.61 (1.41-1.83)        | 1.61 (1.41-1.84)           |
| Race (reference=white)                            |                              |                         |                            |
| Asian                                             | 0.92 (0.62-1.35)             | 0.91 (0.62-1.34)        | 0.92 (0.62-1.35)           |
| Black                                             | 1.08 (0.80-1.45)             | 1.07 (0.79-1.43)        | 1.08 (0.81-1.45)           |
| Hispanic                                          | 0.76 (0.62-0.94)             | 0.76 (0.62-0.94)        | 0.76 (0.61-0.93)           |
| Unknown/missing                                   | 0.91 (0.76-1.08)             | 0.90 (0.76-1.08)        | 0.91 (0.76-1.08)           |
| Comorbidity Index (reference=0)                   |                              |                         |                            |
| 1                                                 | 1.78 (1.53-2.07)             | 1.80 (1.55-2.10)        | 1.81 (1.55-2.10)           |
| 2 or higher                                       | 2.74 (2.22-3.38)             | 2.85 (2.31-3.52)        | 2.85 (2.31-3.51)           |
| Imaging study (reference=no any imaging study)    |                              |                         |                            |
| Any CT                                            | 1.00 (0.80-1.24)             | 0.98 (0.79-1.23)        | 1.01 (0.81-1.25)           |
| Any US, no CT                                     | 0.74 (0.58-0.95)             | 0.71 (0.56-0.91)        | 0.74 (0.58-0.94)           |
| X-ray only                                        | 1.74 (1.16-2.59)             | 1.54 (1.03-2.32)        | 1.75 (1.17-2.62)           |
| Census region (reference=West)                    |                              |                         |                            |
| Midwest                                           | 1.21 (0.99-1.46)             | 1.19 (0.98-1.45)        | 1.19 (0.98-1.45)           |
| Northeast                                         | 0.92 (0.69-1.22)             | 0.90 (0.68-1.20)        | 0.91 (0.69-1.21)           |
| South                                             | 1.09 (0.91-1.29)             | 1.09 (0.91-1.30)        | 1.11 (0.93-1.32)           |
| Lab test (reference=respective lab not performed) |                              |                         |                            |
| Urinalysis                                        | 1.06 (0.88-1.27)             | 1.05 (0.88-1.27)        | 1.06 (0.88-1.27)           |
| CBC                                               | 1.58 (1.32-1.90)             | 1.60 (1.33-1.92)        | 1.58 (1.32-1.90)           |
| C-statistic                                       | 0.657                        | 0.665                   | 0.655                      |
| Symptom                                           | 0.77 (0.58-1.02)             | 1.09 (0.56-2.10)        | 2.99 (2.25-3.96)           |
| Age group (reference=0–5)                         |                              |                         |                            |
| 6 – 10                                            | 0.48 (0.38-0.61)             | 0.48 (0.38-0.62)        | 0.54 (0.42-0.69)           |
| 11 – 15                                           | 0.48 (0.38-0.60)             | 0.49 (0.39-0.61)        | 0.55 (0.44-0.70)           |
| 16 – 17                                           | 0.51 (0.40-0.66)             | 0.53 (0.41-0.68)        | 0.60 (0.46-0.77)           |
| Sex (reference=male)                              |                              |                         |                            |
| Female                                            | 1.61 (1.41-1.84)             | 1.61 (1.41-1.84)        | 1.62 (1.42-1.85)           |
| Race (reference=white)                            |                              |                         |                            |
| Asian                                             | 0.91 (0.62-1.35)             | 0.92 (0.62-1.35)        | 0.93 (0.63-1.36)           |

|                                                     |                  |                  |                  |
|-----------------------------------------------------|------------------|------------------|------------------|
| Black                                               | 1.08 (0.81-1.45) | 1.08 (0.81-1.45) | 1.07 (0.80-1.44) |
| Hispanic                                            | 0.76 (0.61-0.93) | 0.76 (0.62-0.93) | 0.76 (0.61-0.93) |
| Unknown/missing                                     | 0.91 (0.76-1.08) | 0.91 (0.76-1.08) | 0.91 (0.76-1.08) |
| Comorbidity Index (reference=0)                     |                  |                  |                  |
| 1                                                   | 1.81 (1.55-2.11) | 1.80 (1.55-2.10) | 1.78 (1.53-2.08) |
| 2 or higher                                         | 2.86 (2.32-3.53) | 2.84 (2.31-3.50) | 2.64 (2.14-3.27) |
| Imaging study (reference=no any imaging study)      |                  |                  |                  |
| Any CT                                              | 1.01 (0.81-1.26) | 1.01 (0.81-1.25) | 1.06 (0.85-1.32) |
| Any US, no CT                                       | 0.74 (0.58-0.95) | 0.74 (0.58-0.95) | 0.77 (0.60-0.99) |
| X-ray only                                          | 1.76 (1.18-2.63) | 1.77 (1.19-2.64) | 1.78 (1.19-2.66) |
| Census region (reference=West)                      |                  |                  |                  |
| Midwest                                             | 1.19 (0.98-1.45) | 1.20 (0.98-1.45) | 1.17 (0.96-1.42) |
| Northeast                                           | 0.91 (0.69-1.21) | 0.92 (0.69-1.21) | 0.91 (0.69-1.21) |
| South                                               | 1.11 (0.93-1.32) | 1.10 (0.92-1.31) | 1.09 (0.91-1.30) |
| Lab test (reference=respectively lab not performed) |                  |                  |                  |
| Urinalysis                                          | 1.06 (0.88-1.27) | 1.06 (0.88-1.27) | 1.08 (0.90-1.30) |
| CBC                                                 | 1.59 (1.32-1.91) | 1.59 (1.32-1.91) | 1.57 (1.31-1.89) |
| C-statistic                                         | 0.654            | 0.654            | 0.656            |

Abbreviations: Abd, abdominal; CBC, complete blood count; CT, computed tomography; US, ultrasonography.

For adjusted odds ratios with presence of symptom, referent groups include all others that were not in this undifferentiated symptom category. For example, patient episodes that presented with "abdominal pain only" would have a referent group of all others that were not "abdominal pain only".

For race and ethnicity, we used the definitions from the Clinformatics DataMart, where there is only one race category and each appear mutually exclusive. They use a proprietary algorithm representing a compilation of fields including known race or proprietary ethnic code tables. This is a combination of information sources including public records, self-reported surveys, and a proprietary ethnic code table.

**eTable 6.** Potentially Missed Appendicitis Cases That Had Imaging at Index Emergency Department Visit Compared With Those That Had imaging on Return Visit

|       | Children                  |                         |              | Adult                     |                         |              |
|-------|---------------------------|-------------------------|--------------|---------------------------|-------------------------|--------------|
|       | Index ED Visit<br>No. (%) | Return Visit<br>No. (%) | No.<br>Total | Index ED Visit<br>No. (%) | Return Visit<br>No. (%) | No.<br>Total |
| CT    | 13 (2.06)                 | 617 (97.94)             | 630          | 105 (2.03)                | 5078 (97.97)            | 5183         |
| US    | 13 (2.78)                 | 455 (97.22)             | 468          | 78 (5.76)                 | 1276 (94.24)            | 1354         |
| X-ray | 23 (6.27)                 | 344 (93.73)             | 367          | 167 (9.86)                | 1526 (90.14)            | 1693         |
| CBC   | 17 (7.66)                 | 205 (92.34)             | 222          | 138 (6.79)                | 1894 (93.21)            | 2032         |
| Urine | 5 (2.30)                  | 212 (97.7)              | 217          | 5 (4.59)                  | 1519 (95.41)            | 1592         |

Abbreviations: CBC, complete blood count; CT, computed tomography; ED, emergency department; US, ultrasonography.
